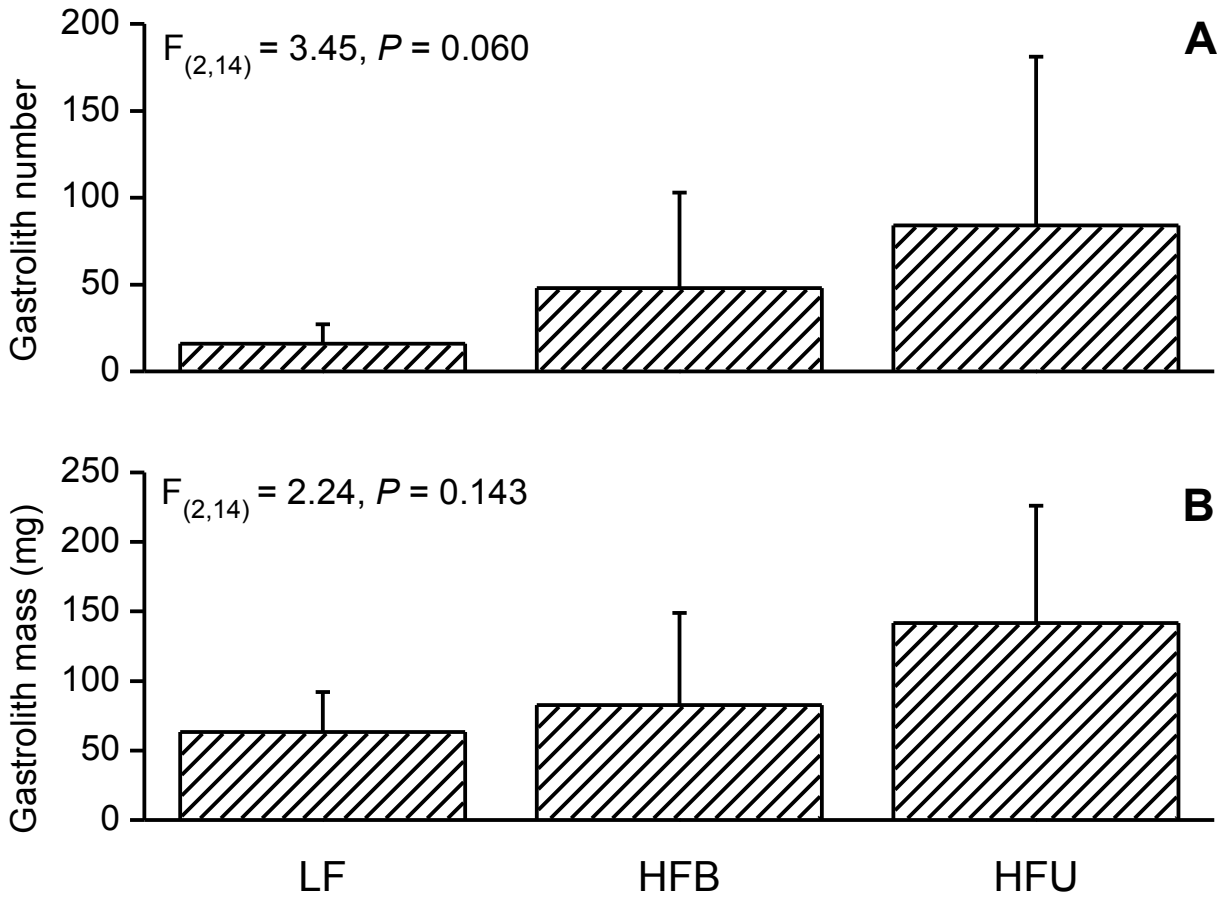

**Fig. S1.** Mean ( $\pm$  SD) number (A) and mass (B; mg) of gastroliths (gizzard ‘rocks’) collected from king quail offered low fibre (LF;  $n = 6$ ), high fibre balanced (HFB;  $n=6$ ) and high fibre unbalanced (HFU;  $n = 5$ ) diets. Note: Gizzard contents from one quail offered the HFU diet was inadvertently discarded.
